# Supplementary material for: Anion-induced self-assembly of positively charged polycyclic aromatic hydrocarbons towards nanostructures with controllable two-dimensional morphologies
Source: Royal Society of Chemistry journal article supplement (doi:10.1039/c5ce02171e), 2016-01-01
Supplement: c5ce02171e1.pdf [file c5ce02171e1.pdf]

## **Supplementary Information**

### **Anion-induced Self-Assembly of Positively Charged Polycyclic Aromatic Hydrocarbons towards Nanostructures with Controllable Two-dimensional Morphologies**

Chongqing Yang,<sup>a</sup> Dongqing Wu,<sup>\*a</sup> Wuxue Zhao,<sup>a</sup> Weizhen Ye,<sup>b</sup> Zhixiao Xu,<sup>a</sup> Fan  
Zhang<sup>a</sup> and Xinliang Feng<sup>a, c</sup>

<sup>a</sup>. School of Chemistry and Chemical Engineering, Shanghai JiaoTong University,  
200240 Shanghai, China. E-mail: wudongqing@sjtu.edu.cn

<sup>b</sup>. Research Institute of Petroleum Processing, SINOPEC, 100083 Beijing, China

<sup>c</sup>. Department of Chemistry and Food Chemistry, Technische Universitaet Dresden,  
01062 Dresden, Germany.

## **Experimental Section**

### **Materials:**

All chemicals were obtained from commercial suppliers such as Aldrich, Aladdin, and Adamas and used without purification. Irradiations with an external UV source were performed with a 254 nm lamp (38 W).

### **Characterizations:**

<sup>1</sup>H Nuclear Magnetic Resonance (NMR) spectra was recorded on the Mercury Plus 400 (400 MHz) spectrometer with tetramethylsilane as the internal reference and DMSO-d<sub>6</sub> as the solvent. The elemental analysis was measured on Vario EL Cube for N element and on the inductively coupled plasma optical emission spectrometer (iCAP6300, Thermo) for the noble metals. Fourier transform infrared spectroscopy (FTIR) was performed on a Spectrum 100 (Perkin Elmer, Inc., USA) spectrometer with a scan range of 4000 - 400 cm<sup>-1</sup>. The sample powders were pulverized with KBr, and pressed into disks. The morphology analysis of the samples was acquired by field-emission scanning electron microscope (FESEM, FEI, Sirion 200, 25 KV) and transmission electron microscope (TEM, JEOL, JEM-2010, 200 KV). The WAXD experiments were performed on a Rigaku D/Max 2500 X-ray diffractometer with Cu K<sub>α</sub> radiation ( $\lambda = 1.54 \text{ \AA}$ ) with a scanning speed of 0.5°/min from 3 to 30 °. The molecular modeling and Pawley Refinement were performed by Reflux, implemented in the Material Studio program package version 6.1.

### Synthesis of PQPC<sub>6</sub>-BF<sub>4</sub>:

The synthesis of 2-phenyl-9-alkylbenzoquinolizino[4,5,6,7-*fed*] phenanthridinylium tetrafluoroborate salts (PQPC<sub>6</sub>-BF<sub>4</sub>, Scheme 1) was carried out according to the previously reported method<sup>1</sup>.

PQPC<sub>6</sub>-BF<sub>4</sub>: Yellow powder. <sup>1</sup>H NMR (400MHz, DMSO-*d*<sub>6</sub>, 25°C): δ(ppm) = 9.55 (s, 2H, aromatic), 9.27-9.24 (d, 2H, *J*=8.4Hz, aromatic), 8.86-8.84 (d, 4H, *J*=8.4Hz, aromatic), 8.51-8.49 (dd, 2H, *J*=6.4, 2.8Hz aromatic), 8.02-7.98 (t, 2H, *J*=7.6 Hz, aromatic), 7.91-7.87 (t, 2H, *J*=7.7 Hz, aromatic), 7.75-7.73 (m, 3H, aromatic), 2.96-2.92 (t, 2H, *J*=8.0 Hz, CH<sub>2</sub>), 1.80-1.75 (m, 2H, CH<sub>2</sub>), 1.37-1.30 (m, 6H, CH<sub>2</sub>), 0.89-0.86 (t, 3H, *J*=7.0 Hz, CH<sub>3</sub>).

### Preparation of PQPC<sub>6</sub>-M ionic complexes:

Preparation of PQPC<sub>6</sub>-PtCl<sub>4</sub>: To the DMF/MeOH (V/V=5 ml/35 ml) solution of PQPC<sub>6</sub>-BF<sub>4</sub> (55 mg), the aqueous solution of K<sub>2</sub>PtCl<sub>4</sub> (0.5eq, 20 mL) was added drop by drop in 15min. Then, the mixture was gently stirred for 4h at 298 K before certification. At last, the collected precipitates were washed by water and methanol subsequently. After drying in vacuum, the yellowish powders were grinded and collected (yield = 87.2%).

Preparation of PQPC<sub>6</sub>-PdCl<sub>6</sub>: To the DMF/MeOH (V/V=5ml/35ml) solution of PQPC<sub>6</sub>-BF<sub>4</sub> (55mg), the aqueous solution of K<sub>2</sub>PdCl<sub>6</sub> (0.5eq, 20 mL) was added drop by drop in 15min. Then, the mixture was gently stirred for 4h at 298K before certification. At last, the collected precipitates were washed by water and methanol subsequently. After vacuum drying, the yellowish powders were grinded and collected (yield = 88.6%).

Preparation of PQPC<sub>6</sub>-AuCl<sub>4</sub>: To the DMF/MeOH (V/V=5ml/35ml) solution of PQPC<sub>6</sub>-BF<sub>4</sub> (55mg), the aqueous solution of K<sub>2</sub>AuCl<sub>4</sub> (0.5eq, 20 mL) was added drop by drop in 15min. Then, the mixture was gently stirred for 4h at 298K before certification. At last, the collected precipitates were washed by water and methanol subsequently. After vacuum drying, the yellowish powders were grinded and collected (yield = 82.8%).

**Table S1.** The calculated and found elemental analysis of the ionic complexes

PQPC<sub>6</sub>-M.

| Ionic Complexes                      | Calculated (%) |      |      | Found (%) |      |      |
|--------------------------------------|----------------|------|------|-----------|------|------|
|                                      | C              | H    | N    | C         | H    | N    |
| PQPC <sub>6</sub> -PtCl <sub>4</sub> | 66.40          | 4.78 | 2.21 | 64.45     | 4.61 | 2.39 |
| PQPC <sub>6</sub> -PdCl <sub>6</sub> | 67.35          | 4.84 | 2.24 | 65.21     | 4.61 | 2.27 |
| PQPC <sub>6</sub> -AuCl <sub>4</sub> | 52.32          | 3.76 | 1.74 | 52.79     | 3.87 | 1.81 |

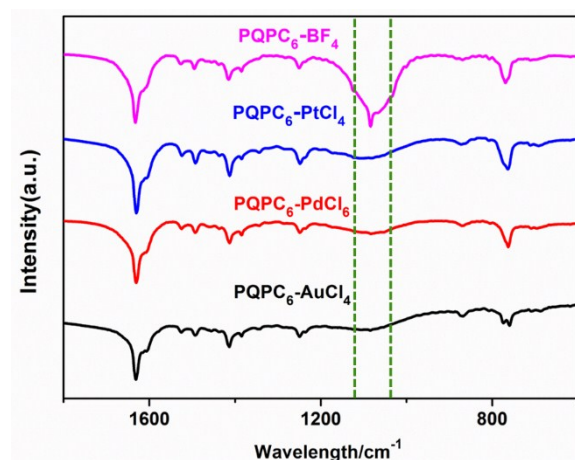

**Fig. S1.** The FTIR analysis of PQPC<sub>6</sub>-BF<sub>4</sub> and PQPC<sub>6</sub>-M. All the F-B-F vibrational frequencies at about 1085 cm<sup>-1</sup> were totally absent in Fourier transform infrared spectroscopy (FTIR) spectra of PQPC<sub>6</sub>-PtCl<sub>4</sub>.

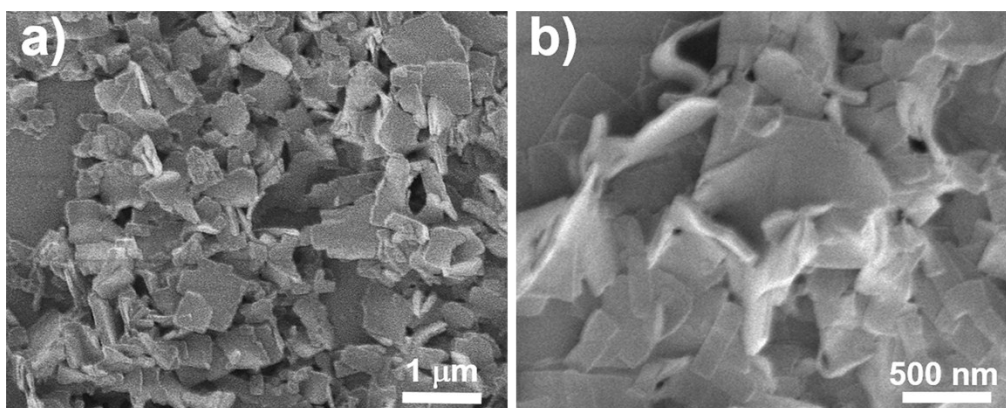

**Fig. S2** a) SEM images of ionic complex PQPC<sub>6</sub>-PtCl<sub>4</sub> formed in DMF;b) SEM images of ionic complex PQPC<sub>6</sub>-PtCl<sub>4</sub> formed in MeOH.

**Table S2.** The simulated crystal parameters of PQPC<sub>6</sub>-Pt, PQPC<sub>6</sub>-PdCl<sub>6</sub>, PQPC<sub>6</sub>-AuCl<sub>4</sub> and PQPC<sub>6</sub>-BF<sub>4</sub> extracted from the WAXS.

| Name                                 | Crystal System | a/Å   | b/Å   | c/Å   | $\alpha$ | $\beta$ | $\gamma$ | Volume  |
|--------------------------------------|----------------|-------|-------|-------|----------|---------|----------|---------|
| PQPC <sub>6</sub> -PtCl <sub>4</sub> | Monoclinic     | 23.32 | 9.11  | 11.71 | 90.00    | 114.66  | 90.00    | 2258.71 |
| PQPC <sub>6</sub> -PdCl <sub>6</sub> | Triclinic      | 8.40  | 14.93 | 21.39 | 47.89    | 78.65   | 102.11   | 1722.34 |
| PQPC <sub>6</sub> -AuCl <sub>4</sub> | Triclinic      | 10.63 | 10.67 | 16.00 | 85.13    | 119.66  | 97.27    | 1565.09 |

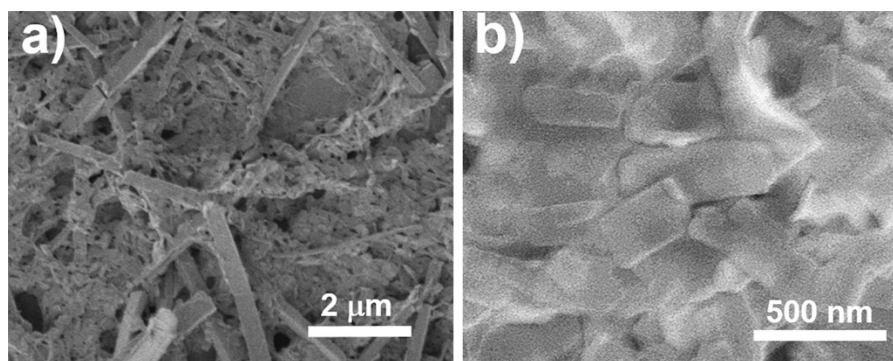

**Fig. S3** a) and b) SEM images of the aggregates from PQPC<sub>6</sub> with both PtCl<sub>4</sub><sup>2-</sup> and PdCl<sub>6</sub><sup>2-</sup> as anions (molar ratio of anion = 1:1).

### ***Reference***

- 1 D. Wu, L. Zhi, G. J. Bodwell, G. Cui, N. Tsao and K. Müllen, *Angew. Chem. Int. Ed.*, 2007, 46, 5417.
